# Supplementary material
Source: publisher site journal article supplement (https://www.dovepress.com/article/265825)
Supplement: Supplementary file 1 [file get_supplementary_file.php]

**Appendix 1. Search strategy for four databases**

| **Databases** | **Search strategy** | **Records** |
| --- | --- | --- |
| **PubMed** | ((((((((Hospital manager*[Title/Abstract]) OR Hospital management[Title/Abstract]) OR Hospital leadership[Title/Abstract]) OR healthcare leadership[Title/Abstract]) OR health service manager*[Title/Abstract]) OR Health manager*[Title/Abstract]) OR Healthcare manager*[Title/Abstract])) AND (((skill*[Title/Abstract]) OR competenc*[Title/Abstract])) Sort by: Best Match Filters: Publication date from 2000/01/01 to 2018/12/31 | 469 |
| **Scopus** | (TITLE-ABS-KEY("Hospital manager" OR "Hospital management" OR "Hospital leadership" OR "healthcare leadership" OR "health service manager" OR "Health manager" OR "Healthcare manager") AND TITLE-ABS-KEY(skill OR competenc*)) AND (LIMIT-TO(LANGUAGE, "English")) AND (LIMIT-TO(SRCTYPE,"j") AND (LIMIT-TO(SUBJAREA, "MEDI") OR LIMIT-TO(SUBJAREA, "NURS") OR LIMIT-TO( SUBJAREA, "SOCI") OR LIMIT-TO(SUBJAREA, "BUSI") OR LIMIT-TO(SUBJAREA, "HEAL")) | 2446 |
| **WOS** | TOPIC: ('Hospital manager' OR 'Hospital management' OR 'Hospital leadership' OR 'healthcare leadership' OR 'health service manager' OR 'Health manager' OR 'Healthcare manager') AND TOPIC: (skill OR Competenc*)  Refined by: WEB OF SCIENCE CATEGORIES: (NURSING OR HEALTH CARE SCIENCES SERVICES OR HEALTH POLICY SERVICES OR MANAGEMENT) AND DOCUMENT TYPES: (ARTICLE OR REVIEW) AND LANGUAGES: (ENGLISH)  Timespan: All years. Indexes: SCI-EXPANDED, SSCI, CPCI-S, CPCI-SSH, ESCI. | 2589 |
| **Emerald** | "Hospital manager" OR "Hospital management" OR "Hospital leadership" OR "healthcare (leadership" OR "health service manager" OR "Health manager" OR "Healthcare manager") AND (skill OR competenc*) anywhere, limit to research paper and general review | 467 |

**Appendix 2 Quality assessment of selected studies**

**Table A1 Quality assessment for qualitative studies**

| Studies | 1 - Are there clear research questions? | 2 - Do the collected data allow to address the research questions? | 3- Is the qualitative approach appropriate to answer the research question? | 4 - Are the qualitative data collection methods adequate to address the research question? | 5 - Are the findings adequately derived from the data? | 6 - Is the interpretation of results sufficiently substantiated by data? | 7 - Is there coherence between qualitative data sources, collection, analysis and interpretation? |
| --- | --- | --- | --- | --- | --- | --- | --- |
| Barati *et al.* (2016) | Yes | Yes | No | Yes | Yes | Yes | Yes |
| Luo *et al*. (2016) | Yes | Yes | Yes | Yes | Yes | Yes | Yes |
| Wongprasit (2013) | Yes | Yes | Yes | Yes | Yes | Yes | Yes |
| Sherman *et al.* (2007) | Yes | Yes | Yes | Yes | Yes | No | Yes |
| Connelly *et al*. (2003) | Yes | Yes | Yes | Yes | Yes | Yes | Yes |

**Table A2 Quality assessment for mixed methods studies**

| Studies | 1 - Are there clear research questions? | 2 - Do the collected data allow to address the research questions? | 3 - Is there an adequate rationale for using a mixed methods design to address the research question? | 4 - Are the different components of the study effectively integrated to answer the research question? | 5 - Are the outputs of the integration of qualitative and quantitative components adequately interpreted? | 6 - Are divergences and inconsistencies between quantitative and qualitative results adequately addressed? | 7 - Do the different components of the study adhere to the quality criteria of each tradition of the methods involved? |
| --- | --- | --- | --- | --- | --- | --- | --- |
| Gunawan *et al*. 2019 | Yes | Yes | Yes | Yes | Yes | Yes | Yes |
| Liang *et al*. (2018) | Yes | Yes | No | Yes | Yes | Yes | Yes |
| Tuong and Thanh (2017) | Yes | Yes | Yes | Yes | Yes | Yes | Yes |
| Liang *et al*. (2013) | Yes | Yes | No | Yes | Yes | Yes | Yes |

**Table A3 Quality assessment for quantitative descriptive studies**

| Studies | 1 - Are there clear research questions? | 2 - Do the collected data allow to address the research questions? | 3 - Is the sampling strategy relevant to address the research question? | 4 - Is the sample representative of the target population? | 5 - Are the measurements appropriate? | 6 - Is the risk of nonresponse bias low? | 7 - Is the statistical analysis appropriate to answer the research question? |
| --- | --- | --- | --- | --- | --- | --- | --- |
| Kantanen *et al*. (2015) | Yes | Yes | No | Yes | Yes | No | Can’t tell |
| Pillay (2010) | Yes | Yes | No | Yes | Yes | Yes | Yes |
| Pillay (2008) | Yes | Yes | No | Yes | Yes | Yes | Yes |

**Appendix 3**

**Table A4 Competencies and behavioral items from selected studies mapped against the MCAP framework**

| **Competencies** | **Subthemes** | **MCAP behavioral** **items** | **MCAP items not mentioned in selected studies** | **Items from 11 studies selected for analysis** |
| --- | --- | --- | --- | --- |
| **Evidence-informed decision-making** | **Evidence appraisal** | C1.1 Uses timely and appropriate questioning/investigation to identify the nature of a problem, issue or opportunity  C1.2 Seeks appropriate evidence from multiple organisational sources to guide the identification of solutions  C1.3 Seeks appropriate (qualitative /quantitative) evidence from multiple external sources to guide the identification of solutions  C1.4 Critically appraises the validity and relevance of evidence  C1.5 Assesses and prioritises the relevance of evidence to the question(s) | C1.1 and C1.4;  C1.2 and C1.3 are only partially covered | Gathers sufficient information prior to making decisions;  Prioritizes/decides the order of importance of tasks;  Acts as a clinical resource; sharing knowledge;  Uses knowledge of available clinical resources when needed;  Analysis and problem solving; Conceptual Skills. |
| **Evidence application and decision making** | C1.6 Uses evidence to question and improve existing practice and processes  C1.7 Applies the best form(s) of evidence to guide management decision-making  C1.11 Supports and encourages colleagues and subordinates to use evidence to guide decision-making  C1.12 Anticipates and prepares for the future by staying abreast of best practice and emerging trends that will have an impact on health outcomes | C1.6 and C1.12  C1.7 is only partially covered | Promotion of evidence-based decision-making;  Evidence based medicine;  Decision-making;  Involves staff in building consensus on issues;  Make decisions in a timely manner and communicates those decisions to staff;  Make decisions; Use knowledge of medical equipment to provide care;  Use knowledge of patient status to plan care; Use knowledge of staff capabilities to plan care;  Use knowledge of unit, type of patients, procedures, etc., to plan work.  Shared decision-making by involving staff in the process of change; Using evidence-based practice in nursing care |
| **Evaluation of decision** | C1.8 Evaluates the process of seeking and applying evidence to management decision-making  C1.9 Anticipates decision implementation problems/impacts and develops and communicates appropriate contingency plans  C1.10 Sets and uses measures to evaluate decision outcomes | C1.8, C1.9, C1.10 | Considers the impact of unit decisions on the rest of the organization |
| **Operations, administration and resource management** | **Staff management** | C2.1 Completes necessary workforce records (e.g. overtime, leave, rosters, attendance, absence) to inform the payroll process  C2.2 Balances the needs of organisation and of staff through effective planning and management of staff roster and work coverage  C2.8 Designs and develops appropriate roles and reporting structure (across a range of areas) in accordance with organisational objectives  C2.9 Effectively manages recruitment, selection and appointment of sufficient, suitably skilled staff  C2.10 Effectively manages staff turnover to boost retention  C2.11 Manages staff in accordance with human resource policy and procedure  C2.13 Conducts regular two-way performance review & development discussions to support staff development  C2.14 Recognises and develops the performance of others by providing timely and appropriate feedback | C2.2 and C2.11 are only partially covered | Human Resource planning; Using HRM principles appropriately; Planning nursing training; Managing workforce diversity;  Provides timely feedback to staff on performance issues; Accurately assesses staff competencies; Maintains complete staff HR records as required by the institution; Provides coaching to staff on performance issues; Recognizes and tackles morale issues; Delegates responsibilities to others based on their ability and potential; Helps staff recognize the berries to growth and development; Sets clear, well-defined outcome for work and tracks progress;  Provides staff with growth and development; Works collaboratively to recruit and select exceptional staff; Interviews to assess candidate competency for the position; Implements effective strategies to retain staff; Ensures that staff know what is expected from them at work; Provides praise and recognition for good work; Seeks staff input regarding the resource, equipment, and supplies they need to their work; Stays updated on healthcare agency personnel policies and communicates changes to staff;  Implements the organization’s progressive disciplinary policy in a fair and consistent manner; Provides staff with outside employee assistance resources and services when needed; Provides an effective clinical orientation and ongoing training to new staff; Utilizes staff as coaches and mentor to other nursing staff; Assists staff in managing conflict; Shows appreciation when staff work overtime or change their schedules; Rewards and celebrates staff successes in a way that is meaningful to the staff member; Recognizes staff who provide excellent customer service; Develop and train the staff; Protect staff; Assess requirements and take action to provide adequate staff; Delegate workload appropriately and fairly. Evaluating nurses staff performance based on standard and key performance indicators; Providing positive feedback and reinforcement for improvement of staff performance; Advocating for staffs in assertive and confident manner; Arranging schedules and supporting flexible self-scheduling for staff; Effectively assigning task responsibility and authority to subordinates; Managing the number and qualification of nurse staff based on the standard of hospital; Determining and evaluating staffing needs; Setting up learning opportunities, trainings, continuing education and others related to nurse staff development; Identifying and matching nurse staff competence with patient acuity; Coaching or mentoring staff in developing problem-solving skills; Relieving staff spiritual distress |
| **Financial Management** | C2.3 Interprets and acts upon financial statements  C2.4 Monitors financial performance by analysing a variety of financial data  C2.5 Develops budgets in accordance with organisational objectives  C2.6 Manages budgets in accordance with organisational objectives  C2.12 Establishes and maintains the organisation’s insurance contracts and financial relationships | C2.12 is only partially covered | Financial performance evaluation; Budgeting and resource allocation,  Budgeting; Controlling and allocating financial resources;  Planning of resources; Evaluating financial performance,  Tracks and assesses staffing, equipment and supply expenses throughout the year; Utilizes resources given in a judicious manner; Educates staff about financial issues that impact the unit; Develops realistic budget projections and stays within budget; Considers organizational profit and loss information in making budget decisions; Modifies budget priorities based on budget variances; Creatively manages flexible staffing pattern to meet patient care needs; Engages staff in considering the best use of budget resources;  Delegates and holds staff accountable for the efficient of resources;  Remains current on reimbursement issues and methodology and assesses the impact on budget;  Stays current on financial issues that impact the healthcare agency, Manages cost and supply issues.  Actively participating in arranging a practical annual budget for the unit that includes volume, revenue, personnel, supplies, and capital equipment; Communicating fiscal management expectations and outcomes to staff and other stakeholders; Implementing cost benefit analysis approach in financial plan in the unit |
| **Organisation Management** | C2.7 Anticipates and plans for changes in policies affecting funding to the organisation/unit  C2.15 Contributes to continuous improvement of organisational processes, including quality and safety  C2.16 Uses performance measures and industry benchmarks to inform continuous performance improvement  C2.17 Plans, executes and evaluates projects with significant scope and impact | C2.7 and C2.17 | Service initiation and innovation,  Monitoring and evaluation;  Supervision; Plan making,  Managing delivery; Structuring of health services organization; Evaluation of health service technology;  Ability to conduct clinical audit; Managed health care principles; Measuring performance of health care organizations,  Task organization,  Complexity management; Performance measurement,  Planning and implementation of health promotion programmes;  Evaluating medical necessity and effectiveness of products or interventions;  Measuring of organizational performance; Assessing the quality of care; Assessing patient satisfaction; Implementing health quality improvement systems;  Managing of nursing quality;  Evaluating health service delivery programs;  Managing of environmental safety and sanitation;  Planning programs,  Participates in performance improvement activities and reviews monitors used by the institution to evaluate patient care;  Monitors the work environment for potential safety issues that could impact staff and patients,  Completes administrative duties; Supervise the work of the nursing staff; Coordinates multiple tasks in order to keep unit operations flowing;  Deals with interruptions; Uses a method to keep organized; Prepare prior to the beginning of shift; Oversee unit functions to ensure overall quality of care/practice; Provide for patient safety; Maintain a safe, clean physical unit environment; Assess/evaluate clinical and operational information.  Engaging in regular supervision or consulting with superordinates; Coordinating with supervisor among departments; Continually understanding and measuring quality of care in terms of structure, process, and outcome; Analyzing the workflow of unit and identifying errors, causes, and its effects in nursing service; Actively participating in setting nursing practice standards or guidelines for nursing care in unit |
| **Demonstrated knowledge of healthcare environment and the organisation** | **Knowledge of healthcare environment** | C3.1 Demonstrates understanding of the healthcare industry and its impact on healthcare organisations  C3.2 Demonstrates understanding of demographic, political, social, technical, cultural and economic factors and their impact on the organisation  C3.3 Demonstrates understanding of the roles of key stakeholders in health and how they interact  C3.4 Demonstrates understanding of the highly professionalised health workforce  C3.8 Applies risk management concepts and techniques  C3.9 Demonstrates understanding of the diversity of healthcare needs | C3.3 and C3.4 | Risk and disaster management;  Marketing of health care organization; Analysis of the wider health system; Analysis of internal and external environment of organization;  Analysis of government programs; Health promotion skills;  Epidemiologic analysis; Understanding the district health system;  Synthesizes concept thinking and analytical thinking in risk management (analyse relevant relationships and solve problems through scientific methods);  Use of epidemiological data; Assessing the impact of health services delivery on health of population;  Provides visionary thinking on issues that impact the work area based on knowledge of the healthcare industry and health policy.  Facilitating nursing staff in collaboration with other health professions in practice, especially with medical doctors in providing patient-centered care; |
| **Knowledge of organisation** | C3.10 Demonstrates awareness of the organisation’s history, culture and development  C3.11 Effectively navigates organisational structures, roles and relationships in order to achieve work goals |  | Clinical competence and expertise;  Work-awareness; Cooperating with the chief physician, Medical doctor management;  Nursing standard and guideline setting; Structure Health Service organization; Setting organizational culture,  Having managerial experience; Having work experience in hospital settings,  Knows and uses hospital/unit policies and patient procedures appropriately;  Understand what is happening in whole hospital in order to adjust running the unit,  Familiarity with the tasks and functions of management roles. |
| **Application of knowledge in legal and quality practices** | C3.5 Applies relevant legislation, ethical principles and accountability frameworks specific to healthcare settings  C3.6 Demonstrates awareness of clinical and non-clinical risks specific to healthcare organisations  C3.7 Applies quality indices and benchmarks to identify opportunities, sets performance standards and improves quality |  | Quality management,  Analysis of legal issues; Bioethics; Quality control and improvement in health service organization ;  Clinical quality management;  Hospital and legislation management; Hospital quality standard management;,  Structuring of health services organization,  Use of tools to standardize patient management; Using health service technology;  Labour-related legislation; Health-related legislation; Identification and analysis of an liability issue in a health care setting; Identification and analysis of an ethical issue in a health care setting  Follow through on commitments and agreements; Assures follow- through on customer issues; Initiates conversation with patients to determine satisfaction with nursing care services; Monitors customer service survey results and includes staff on correction planning;  Implements corrective action plans in a timely manner on areas assessed to be out of compliance; Stays updated about regulatory requirement and keep staff informed of changed and impact on the clinical area.  Giving safe and proper legal and ethical care |
| **Interpersonal, communication qualities and relationship management** | **Relationship management and teamwork** | C4.1 Shows trust and respect for the opinions and actions of others  C4.2 Provides appropriate support to others in the workplace  C4.3 Listens and empathises with others  C4.7 Invests time and effort in working and engaging with stakeholders  C4.9 Functions effectively in a team by developing and maintaining professional relationships with people from a wide range of backgrounds  C4.10 Builds collaborative internal and external relationships  C4.11 Adopts a flexible, client-oriented approach that is sensitive to diverse needs  C4.12 Considers and acts with sensitivity to the politics of any given situation | C4.1  C4.10 and C4.12 are only partially covered | Building and maintaining relationships, Relationship skills;  Building their own talent team, Managing teams,  Ability to work with employees; Understanding organizational behavior and mutual understanding of behaviors,  Develops collaborative relationships within the organization; Listens attentively to the ideas and concerns of others; Builds and sustains positive relations in the organization;  Shares information readily with staff; Is inclusive in sharing information with staff; Establishes effective vendor relationships; Works to builds a 1:1 relationship with each staff member; remains flexible and sensitive to staff scheduling needs; Supports staff during difficult interpersonal times; Promotes celebrations and activates to builds a cohesive unit; Demonstrates supportive behaviors in working with staff; Maintains a sensitively about staff reluctance to change and works with staff;  Models a customer focus in all interaction; Expresses and builds concern for the organization's welfare; Team-build-develop cooperative efforts; Support staffs personal needs; Interact positively with head nurse; Uses diplomacy with people; Deal with difficult people, situations, shifts; Influence atmosphere of unit in positive manner; Demonstrate caring for others; Helps staff understand the relationship between their work and organizational goals;  Interpersonal communication qualities and relationship management, Public and industrial relations and networking.  Collaborating and communicating with other health professions in interdisciplinary team;  Getting involved in professional associations and professional development programs;  Getting involved in developing a policy brief and advocacy to policy makers; Paying attention to the spiritual needs of staff |
| **Communications** | C4.4 Engages confidently and constructively in verbal and non-verbal interactions with others  C4.5 Communicates verbally in a clear, logical and grammatically correct manner in both formal and informal situations  C4.6 Produces written reports/materials which are appropriate for both audience and purpose  C4.8 Actively questions, listens, responds and provides feedback as a basis for effective communication  C4.13 Works through conflict (with diverse views) by initiating and engaging in robust conversations | C4.6  C4.5 and C4.13 are only partially covered | Negotiation skills; Effective communication;  Providing feedback to patients and staff;  Managing conflict;  Internal and External communication, Invites contact and is approachable; Articulates ideas effectively both verbally and writing; Succinctly communication viewpoints; Models healthy communication and promotes cooperative;  Is visible and accessible to staff; Approaches staff about sensitive issues in non-threatening ways; Develops rapport easily with a variety of people; Modifies communication style to meet the cultural needs of others; Presents feedback connotatively; Expresses disagreements in a constructive manner;  Be accessible (identify self as the manager); Communicate effectively with head nurse, on-going/off-going shift, physicians, patients/families, staff, supervisors. |
| **Personal quality** | C4.14 Demonstrates awareness of own emotions and their impact on others  C4.15 Shows self-control over disruptive emotions and impulses  C4.16 Maintains focus without distraction and sets realistic goals  C4.17 Shows awareness of, and sensitivity to, the feelings of others |  | Self-management,  Time management; Self-awareness; Balancing work and life issues, Time management; Fairness; Balance work and daily life; Adjust their emotions; Discover their strengths and weaknesses; Motivation and career planning, Motivation skill; Inspiration, Awareness of personal strengths and weaknesses; Balancing work and life issues;  Acting independently; Time management, Motivated and interested to manage, Interest in working in a hospital setting;  Seek feedback on personal strengths and weaknesses; Manages self effectively in emotionally charged situations; Demonstrates fairness in dealing all levels staff; Admits mistakes despite the potential for negative consequences; Projects optimism; Displays and encourage appropriate humor; Models effective personal stress management;Accept the primary role of the charge nurse; Know and deal with personal limitations; Manage time effectively; Uses good judgment.  Identifying strengths of staff and capitalize on those strengths;  Engaging in self-evaluation program in the hospital |
| **Leading people and organisation** | **Leading people and teams** | C5.4 Informs and educates influential decision makers  C5.6 Leads, develops and evaluates performance to build an effective team  C5.7 Empowers others to achieve goals  C5.12 Encourages ideas and identifies opportunities | C5.4  C5.6 and C5.12 are only partially covered | Motivating staff; Managing people and teams,  Empowers staff; motivating nurses,  Teamwork, Managing personnel; Managing conflicts; Motivating employees, Motivating staff, Recognizes and uses the ideas of staff; Manages conflict in professional manner; Stays open to new ideas and approaches;  Effectively builds a cohesive nursing team; Assists staff as effectively supervise and delegate to other team members; Values the opinions and diversity of staff;  Motivate staff to accomplish the mission; Provide leadership during the shift; Assist staff in completing their work.  Leading and inviting staff to pray before working in the unit |
| **Leading organisation** | C5.1 Develops and/or implements a shared vision to achieve organisational goals  C5.2 Manages with reference to the broader organisational context  C5.3 Engages effectively in organisational decision-making |  | Policy development and implementation; Strategy development and orientation, Policy management,  Creating a vision for the hospital; Developing organizational goals; Communicating organizational goals; Preparing of a strategic plan,  Sets achievable goals and is successful in executing plans developed; Effectively communicates the mission, vision and strategies goals of the organization,  Anticipates patient needs, staffing requirements; Engage in anticipatory planning and generating solutions, Offers strategic inputs to the organization. |
| **Leader quality** | C5.8 Adapts leadership style to suit the situation  C5.9 Establishes and maintains a personal and professional support network  C5.10 Perseveres to achieve goals  C5.11 Demonstrates confidence, energy, commitment and enthusiasm  C5.13 Remains calm whilst under pressure | C5.8 | Resilience and composure; Sustained personal commitment; Credibility, Ethics knowledge;  Strategic thinking, Organizational commitment; Role-modelling abilities, Drive to achieve, Displays the personality and prestige of management (e.g., approachability, be authoritative, be ambitious); Trustworthy,  Demonstrates leadership in situation demanding action; Maintains a professional demeanor and serves as a role model for staff; Establishes effective networks with professional colleagues within and outside the organization;  Demonstrates a passion for excellence and a commitment to quality; Remains calm under pressure; Fulfils commitments to team members; demonstrates creativity in dealing with unit problems; Demonstrates behaviors that value diversity; Models coaching and mentoring; encourages inspiring nursing leaders; Takes responsibility for building loyalty and commitment throughout the organization; Role model effectively; Get along with people.  Dealing with anger, criticism, and frustration in a constructive manner  Becoming role model of professional and visioning behavior; |
| **Enabling and Managing Change** | **Change preparation** | C6.1 Explains the need for change in an effective way  C6.2 Assesses readiness for change and plans accordingly  C6.5 Uses available evidence to appraise options  C6.6 Anticipates and appreciates the impact of change and plans accordingly | C6.1 and C6.2  C6.5 and C6.6 are only partially covered | Planning for future needs; Planning further needs and developments;  Deals effectively with change; Manage crises as they occur; Troubleshoot - problem solve to prevent a potential crisis. |
| **Change implementation and evaluation** | C6.7 Implements change and effectively manages the transition process  C6.8 Evaluates the processes and outcomes of change | C6.8 |  |
| **Leader quality in change** | C6.3 Acts accountably and accepts personal responsibility  C6.4 Effectively balances consultation and decisiveness in decision making  C6.9 Recognises and tolerates ambiguity | C6.4 and C6.9  C6.3 is only partially covered | Initiates unit and healthcare agency- wide projects and assumes responsibility for their success; Approaches change in a constructive manner. |
| **From competencies 1,4 and 5** | **Professionalism** | C1.12 Anticipates and prepares for the future by staying abreast of best practice and emerging trends that will have an impact on health outcomes.  C1.13 Commits to ongoing personal and professional development  C3.2 Demonstrates understanding of demographic, political, social, technical, cultural and economic factors and their impact on the organisation.  C3.5 Applies relevant legislation, ethical principles and accountability frameworks specific to healthcare settings.  C4.1 Shows trust and respect for the opinions and actions of others.  C4.18 Invests time in self-care and personal support mechanisms, especially during stressful times.  C4.19 Promotes and adheres to high standards for personal and organisational integrity, honesty, transparency and respect for people  C5.5 Recognises and balances personal, professional and organisational values and priorities.  C6.3 Acts accountably and accepts personal responsibility. | C4.19 is only partially covered | Professional competence; Research and development competence;Integrity and ethical stance; Learning from experience; Self-development; Professional credibility;  Professional ethics management; vision for self-development; Customer oriented; organization oriented; Corporate Social Responsibility; Sense of Balanced Management (to balance between the customers’ needs, employees’ needs and shareholders’ needs); Prioritizing organizational interests over individual interests; have integrity, Ethical ; Assumes responsibility for personnel development and career goals; Takes the initiative to be a continuous learner; Create a climate where self- development and improvement are valued; Learns from setbacks and failure, as well as from successes; Treats all employees with respect; Promotes professional autonomy and responsibly;  Demonstrates a commitment to personal wellness and work life balance; Recognizes the importance of building a sense of community in the work environment; Maintains confidentiality in staff and patient interactions; Promotes nursing as desirable profession; Addresses patient complaints. Establishing mutual trust and respect by dealing with others in a fair manner  Achieving certification in an appropriate field/specialty; Managing self through continuing education and participating in nursing management research/training/course; Reviewing and identifying the influence of cultural beliefs, values, and spiritual on nursing care; Referring effectively and articulately to other spiritual nursing care based on the situation and preference of staff and patient; Facilitating staff to provide spiritual nursing care to patient and families and respect their diversities and differences. |
